# Supplementary material for: Association between time-to-treatment and outcomes in non-small cell lung cancer: a systematic review
Source: HighWire-hosted journal article supplement (doi:10.1136/thoraxjnl-2021-216865), 2021-08-17
Supplement: thoraxjnl-2021-216865supp001_data_supplement.pdf [file thoraxjnl-2021-216865supp001_data_supplement.pdf]

**Title: Association between time-to-treatment and outcomes in non-small cell lung cancer:  
a systematic review**

**Authors:**

Helen K Hall, Adam Tocock, Sarah Burdett, David Fisher, William Ricketts, John Robson,  
Thomas Round, Sarita Gorolay, Emma MacArthur, Donna Chung, Sam M Janes, Michael D  
Peake, Neal Navani

**Online Supplementary materials**

- Table 1a: Database search methodology (Medline)
- Table 1b: Database search methodology (EMBASE)
- Table 1c: Database search methodology (Cochrane)
- Figure 1: PRISMA flowchart
- Table 2: Summary and abstraction of included studies
- Figure 2: Reported time intervals
- Table 3a: Summary of evidence in early disease
- Table 3b: Summary of evidence in regional disease
- Table 3c: Summary of evidence in advanced disease
- Table 3d: Summary of evidence in surgical cohorts
- Table 4: Comparison of studies utilising National Cancer Database
- Table 5a: Bias assessment for observational studies
- Table 5b: Bias assessment for randomised controlled trials

**Table 1a: Database search methodology – outcomes of first search (Medline)**

|                                                                                                                                     |         |
|-------------------------------------------------------------------------------------------------------------------------------------|---------|
| 1. ((lung* AND (carcinogen* OR sarcom* OR metasta* OR tumor* OR tumour* OR 2arcinoma* OR cancer* OR neoplasm*)) AND diagnos*).ti,ab | 47802   |
| 2. Exp *"LUNG NEOPLASMS"/ AND exp *DIAGNOSIS/                                                                                       | 22558   |
| 3. Exp *"LUNG NEOPLASMS"/di                                                                                                         | 15129   |
| 4. (44 OR 45 OR 46)                                                                                                                 | 72249   |
| 5. Exp *"TIME FACTORS"/                                                                                                             | 2019    |
| 6. Exp *"TIME-TO-TREATMENT"/                                                                                                        | 1557    |
| 7. (delay* OR timely OR timeliness OR speed*).ti,ab                                                                                 | 616523  |
| 8. (((“2 week*” OR “two week*”) ADJ wait*) OR 2ww OR tww).ti,ab                                                                     | 234     |
| 9. (48 OR 49 OR 50 OR 51)                                                                                                           | 619407  |
| 10. (47 AND 52)                                                                                                                     | 1899    |
| 11. (outcome*).ti,ab                                                                                                                | 1392388 |
| 12. Exp “PATIENT OUTCOME ASSESSMENT”/                                                                                               | 5386    |
| 13. (70 OR 71)                                                                                                                      | 1393537 |
| 14. (survival).ti,ab                                                                                                                | 802667  |
| 15. Exp MORTALITY/                                                                                                                  | 342122  |
| 16. (mortality).ti,ab                                                                                                               | 634887  |
| 17. (73 OR 74 OR 75)                                                                                                                | 1474956 |
| 18. (72 OR 76)                                                                                                                      | 2540309 |
| 19. (53 AND 77)                                                                                                                     | 696     |

**Table 1b: Database search strategy – outcomes of first search (EMBASE)**

|                                                                                                                                     |         |
|-------------------------------------------------------------------------------------------------------------------------------------|---------|
| 1. ((lung* AND (carcinogen* OR sarcom* OR metasta* OR tumor* OR tumour* OR 2arcinoma* OR cancer* OR neoplasm*)) AND diagnos*).ti,ab | 85332   |
| 2. Exp *"LUNG CANCER"/ AND exp *DIAGNOSIS/                                                                                          | 18020   |
| 3. Exp *"LUNG CANCER"/di                                                                                                            | 21226   |
| 4. (54 OR 55 OR 56)                                                                                                                 | 106387  |
| 5. (delay* OR time* OR timeliness).ti                                                                                               | 344301  |
| 6. (((“2 week*” OR “two week*”) ADJ wait*) OR 2ww OR tww).ti,ab                                                                     | 565     |
| 7. Exp “TIME FACTOR”/                                                                                                               | 19038   |
| 8. (58 OR 59 OR 60)                                                                                                                 | 361215  |
| 9. (57 AND 61)                                                                                                                      | 1409    |
| 10. (outcome*).ti,ab                                                                                                                | 2039908 |
| 11. Exp “TREATMENT OUTCOME”/                                                                                                        | 1396119 |
| 12. (79 OR 80)                                                                                                                      | 2806681 |
| 13. (survival).ti,ab                                                                                                                | 1167404 |
| 14. (mortality).ti,ab                                                                                                               | 922767  |
| 15. Exp SURVIVAL/                                                                                                                   | 941339  |
| 16. Exp MORTALITY/                                                                                                                  | 941184  |
| 17. (82 OR 83 OR 84 OR 85)                                                                                                          | 2379942 |
| 18. (81 OR 86)                                                                                                                      | 4473764 |
| 19. (62 AND 87)                                                                                                                     | 627     |

**Table 1c: Database search strategy – outcomes of first search(Cochrane)**

|     |                                                                                                                                     |        |
|-----|-------------------------------------------------------------------------------------------------------------------------------------|--------|
| #1  | ((lung* AND (carcinogen* OR sarcom* OR metasta* OR tumor* OR tumour* OR 3arcinoma* OR cancer* OR neoplasm*)) AND diagnos*):ti,ab,kw | 5094   |
| #2  | MeSH descriptor: [Lung Neoplasms] explode all trees                                                                                 | 6733   |
| #3  | MeSH descriptor: [Diagnosis] explode all trees                                                                                      | 312508 |
| #4  | #2 and #3                                                                                                                           | 3251   |
| #5  | MeSH descriptor: [Lung Neoplasms] explode all trees and with qualifier(s): [diagnosis – DI]                                         | 275    |
| #6  | #1 or #4 or #5                                                                                                                      | 7504   |
| #7  | MeSH descriptor: [Time Factors] explode all trees                                                                                   | 62064  |
| #8  | MeSH descriptor: [Time-to-Treatment] explode all trees                                                                              | 237    |
| #9  | (delay* OR timely* OR timeliness OR speed*):ti,ab,kw                                                                                | 57111  |
| #10 | ((("2 week" OR "2 weeks" OR "two week" OR "two weeks") and wait*) OR 2ww OR tww):ti,ab,kw                                           | 567    |
| #11 | #7 or #8 or #9 or #10                                                                                                               | 114955 |
| #12 | #6 and #11                                                                                                                          | 650    |
| #13 | (outcome*):ti,ab,kw                                                                                                                 | 496294 |
| #14 | MeSH descriptor: [Patient Outcome Assessment] explode all trees                                                                     | 553    |
| #15 | #13 or #14                                                                                                                          | 496302 |
| #16 | survival or mortality                                                                                                               | 155298 |
| #17 | MeSH descriptor: [Survival] explode all trees                                                                                       | 128    |
| #18 | #16 or #17                                                                                                                          | 155298 |
| #19 | #15 or #17                                                                                                                          | 496348 |
| #20 | #12 and #19                                                                                                                         | 391    |
| #21 | #20 with Cochrane Library publication date from Jan 2012 to present                                                                 | 258    |

Figure 1: PRISMA flowchart

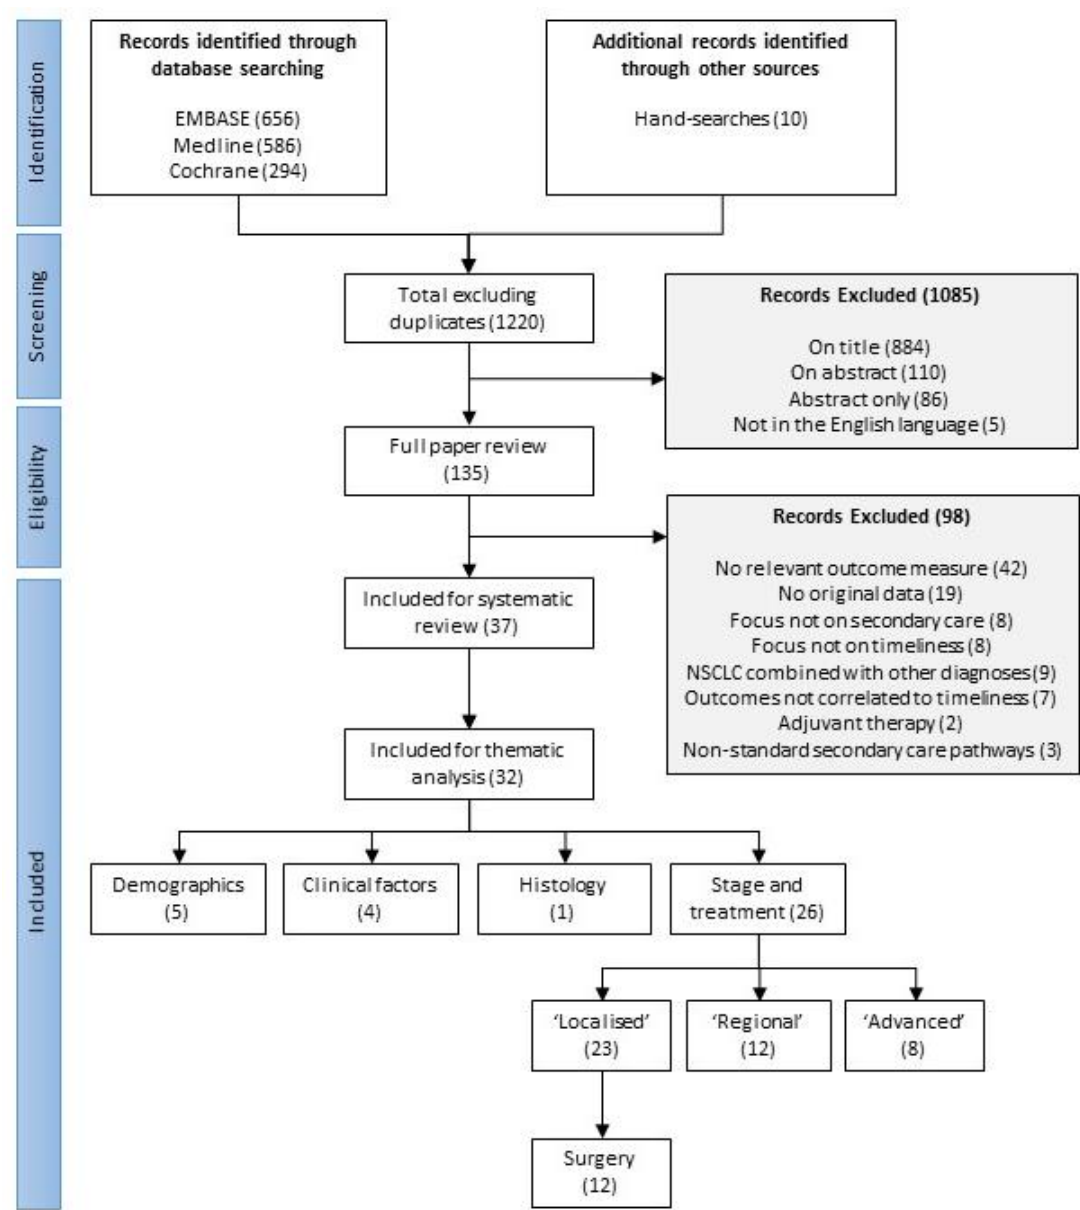

**Table 2: Summary and abstraction of included studies**

| Reference                               | Population and NSCLC* sample size                                                                                            | Design and data source                                         | Measured time intervals                                                                                  | Outcome measure        | Trend (overall)         | Results summary                                                                                                                                                        | Sub-group analysis                    |
|-----------------------------------------|------------------------------------------------------------------------------------------------------------------------------|----------------------------------------------------------------|----------------------------------------------------------------------------------------------------------|------------------------|-------------------------|------------------------------------------------------------------------------------------------------------------------------------------------------------------------|---------------------------------------|
| <b>Abrao 2017</b> (25)<br>Brazil        | All LC, previously untreated<br>n=435                                                                                        | Single centre, observational cohort study<br>2008-2014         | First review to diagnosis, diagnosis to treatment                                                        | LC-specific survival   | Timeliness deleterious  | Worse LC-specific survival seen in those with <1.5 months from diagnosis to first treatment in multivariate analysis (13 vs 4 months, p<0.01).                         | Nil                                   |
| <b>Abrao 2018</b> (46)<br>Brazil        | All NSCLC<br>n=359                                                                                                           | Single centre, observational cohort study<br>2008 - 2014       | Diagnosis to treatment                                                                                   | OS                     | Timeliness deleterious  | Overall intervals of >2 months from diagnosis to treatment was protective, with adjusted HR 0.75 (p=0.001)                                                             | Stage (localised, regional, advanced) |
| <b>Bott 2015</b> (56)<br>USA            | Clinical stage 1 NSCLC undergoing curative resection<br>n=55,653                                                             | Registry (NCDB)<br>1998 - 2010                                 | Histological diagnosis to surgery                                                                        | Pathological upstaging | Timeliness advantageous | A delay of >8 weeks from diagnosis to surgery was associated with higher risk of pathological upstaging (OR 1.10)                                                      | Stage (localised), surgery            |
| <b>Brocken 2012</b> (26)<br>Netherlands | All consecutive referrals to a single centre lung MDT (indeterminate nodules excluded)<br>n=261                              | Single centre, observational cohort study<br>1999 - 2009       | PC referral to first review; first review to diagnosis; PC referral to treatment; diagnosis to treatment | PFS, OS                | Non-significant         | Delays not associated with disease stage or survival                                                                                                                   | Nil                                   |
| <b>Bullard 2017</b> (39)<br>USA         | All NSCLC<br>n=746                                                                                                           | Registry (South Carolina Central Cancer Registry)<br>2005-2010 | Diagnosis to treatment                                                                                   | OS                     | Timeliness deleterious  | Worse survival seen with diagnosis to treatment intervals of <6 weeks in advanced disease                                                                              | Stage (localised, regional, advanced) |
| <b>Coughlin 2015</b> (45)<br>Canada     | Clinical stage I-II NSCLC undergoing surgical resection<br>n=222                                                             | Single centre, observational cohort study<br>2010 - 2011       | Treatment decision to treatment                                                                          | Pathological upstaging | Timeliness advantageous | In stage 2 disease, delays of >8 weeks were associated with increased risk of pathological upstaging and worse survival. Did not meet significance in stage 1 disease. | Stage (localised), surgery            |
| <b>Cushman 2020</b> (52)<br>USA         | Histologically confirmed stage I-IIIB NSCLC treated with curative intent, excluding time to treatment >365 days<br>n=140,455 | Registry (NCDB)<br>2004 - 2015                                 | Diagnosis to treatment                                                                                   | OS                     | Timeliness advantageous | >45 days from diagnosis to treatment associated with median survival 61.5 months vs 70.2 for timely care (p < 0.001)                                                   | Stage (localised, regional), surgery  |

|                                              |                                                    |                                                                                                                                       |                                                                               |                                                                    |                        |                                                                                                                                                                                                                                                             |                                                     |
|----------------------------------------------|----------------------------------------------------|---------------------------------------------------------------------------------------------------------------------------------------|-------------------------------------------------------------------------------|--------------------------------------------------------------------|------------------------|-------------------------------------------------------------------------------------------------------------------------------------------------------------------------------------------------------------------------------------------------------------|-----------------------------------------------------|
| <b>Di Girolamo 2018(67)</b><br>UK            | All NSCLC<br>n=121,963                             | Registry (CWT, NCRAS)<br>2009 - 2013                                                                                                  | PC referral to first review; diagnosis to treatment; PC referral to treatment | One-year net survival (adjusted for competing causes of mortality) | Timeliness deleterious | One-year survival worse in those treated within 31- and 62-day targets                                                                                                                                                                                      | Demographics, stage (localised, regional, advanced) |
| <b>Forrest 2015(35)</b><br>UK                | All lung cancer, any active treatment.<br>n=12,152 | Registry (Lung Cancer Audit; Northern and Yorkshire Cancer Registry and Information Centre; Hospital Episode Statistics)<br>2006-2009 | PC referral to first review; diagnosis to treatment; PC referral to treatment | OS                                                                 | Timeliness deleterious | Treatment within 31 days of diagnosis was associated with worse 2-year survival (OR 0.37)                                                                                                                                                                   | Demographics                                        |
| <b>Frelinghuysen 2017(41)</b><br>Netherlands | Inoperable NSCLC planned for SABR<br>n=123         | Single centre, observational cohort study<br>2005 - 2008                                                                              | Diagnostic CT to treatment planning CT (ISI)<br>Excl if ISI <25 days          | Upstaging, OS                                                      | Non-significant        | Risk of upstaging was not correlated to longer time to treatment                                                                                                                                                                                            | Stage (localised)                                   |
| <b>Friedman 2016(62)</b><br>USA              | All stage III NSCLC<br>n=109                       | Single centre case:control, comparing referral to single clinician versus cancer board                                                | First clinical review to treatment                                            | OS                                                                 | Non-significant        | Patients seen by MTD experienced faster treatment with borderline significant improved median survival (14 vs 17 months, p = 0.054)                                                                                                                         | Stage (regional)                                    |
| <b>Geiger 2014(29)</b><br>USA                | Non-metastatic NSCLC<br>n=47                       | Single centre, observational cohort study<br>2009 – 2011                                                                              | Diagnostic CT to treatment planning CT (ISI)<br>Excl if ISI >120 days         | Upstaging<br>Change in treatment plan                              | Non-significant        | Upstaging observed in 21% of those with ISI <43 days vs 30% of those with ISI >43 days, p = not given                                                                                                                                                       | Nil                                                 |
| <b>Gomez 2015(36)</b><br>USA                 | All NSCLC with Medicare claims<br>n=28,732         | Registry (Medicare claims)<br>2004 - 2007                                                                                             | Diagnosis to treatment                                                        | OS                                                                 | Mixed                  | Treatment within 35 days of diagnosis associated with improved survival in those with localised disease and those with advanced disease who survived >1 year (HR 0.86 for both groups) but worse in those with advanced disease surviving <1 year (HR 1.35) | Demographics, stage (localised, regional, advanced) |
| <b>Gonzalez-Barcala 2014(27)</b><br>Spain    | Pathologically confirmed LC<br>n=262               | Single centre, observational cohort study<br>2005-2008                                                                                | First review to diagnosis, diagnosis to treatment                             | Survival NOS                                                       | Timeliness deleterious | Survival is improved in patients waiting >61 days from diagnosis to treatment, but time from first review to diagnosis was not significant.                                                                                                                 | Nil                                                 |

|                                        |                                                                                             |                                                                  |                                                                                                           |           |                                            |                                                                                                                                                                         |                                                     |
|----------------------------------------|---------------------------------------------------------------------------------------------|------------------------------------------------------------------|-----------------------------------------------------------------------------------------------------------|-----------|--------------------------------------------|-------------------------------------------------------------------------------------------------------------------------------------------------------------------------|-----------------------------------------------------|
| <b>Ha 2018</b> (51)<br>USA             | Stage I-IIIa NSCLC treated with curative intent<br>n=177                                    | Single centre, observational cohort study<br>2010 - 2017         | Tumour board meeting to treatment initiation                                                              | PFS, OS   | Non-significant                            | HR 1.0 (p=0.56) for overall survival in stage I-IIIa<br>HR 1.0 (p=0.74) for DFS in stage I only                                                                         | Stage (localised)                                   |
| <b>Huang 2020</b> (59)<br>Taiwan       | Clinical stage I adenocarcinoma undergoing surgery<br>n=561                                 | Single centre, observational cohort study<br>2006 – 2016         | Radiological diagnosis to surgery (RDS)<br>Histological diagnosis to surgery (HDS)                        | OS        | Non-significant<br>Timeliness advantageous | No significant difference in 5 year survival between timely vs delayed RDS<br>Timely HDS associated with improved 5 year survival, with HR 2.031 in multivariable model | Stage (localised), surgery                          |
| <b>Kanarek 2014</b> (55)<br>USA        | Stage I-II NSCLC, undergoing resection<br>n=174                                             | Single centre, observational cohort study<br>2003 - 2009         | Diagnosis to surgical review, surgical review to treatment, diagnosis to treatment                        | Survival  | Timeliness advantageous                    | Each week of delay from diagnosis to surgery increases HR by 1.04, adjusting for age, stage (IIB) and tumour size.                                                      | Stage (localised), surgery                          |
| <b>Kasymjanova 2017</b> (50)<br>Canada | All NSCLC receiving active treatment, inc targeted therapies<br>n=593                       | Single centre, observational cohort study<br>2010 - 2015         | PC referral to first review; diagnosis to treatment; PC referral to treatment. Others treatment specific. | Survival  | Timeliness advantageous                    | Delays >30 days from diagnosis to treatment associated with worse median survival (11 vs 14.8 months, p=0.04).                                                          | Stage (localised, regional, advanced)               |
| <b>Khorana 2019</b> (40)<br>USA        | All stage 1-2 NSCLC, excluding those without treatment or with delay >180 days<br>n=363,863 | Registry (NCDB)<br>2004 - 2013                                   | Diagnosis to treatment                                                                                    | OS        | Timeliness advantageous                    | Longer time to treatment associated with worse OS in stage 1 and 2 disease undergoing surgery                                                                           | Stage (localised), surgery                          |
| <b>Murai 2012</b> (47)<br>Japan        | Stage 1 NSCLC undergoing SABR<br>n=201                                                      | Multicentre prospective cohort study (sub-analysis)<br>2004-2010 | Diagnostic CT to treatment planning CT                                                                    | Upstaging | Timeliness advantageous                    | Delays >4 weeks from diagnosis to planning CT are associated with increased upstaging (21% vs 0%).                                                                      | Histology, stage (localised),                       |
| <b>Nadpara 2015</b> (33)<br>USA        | All LC diagnoses age >66 years, from Medicare claims and SEER registry<br>n=42,089          | Registry (SEER-Medicare)<br>2002 - 2007                          | CXR to first review; PC referral to first review; diagnosis to treatment; PC referral to treatment        | Survival  | Timeliness deleterious                     | Median survival 281 (271-291) vs 500 (479 - 520) days for timely vs delayed care. Overall survival reported as NSCLC vs SCLC, but not broken down by stage              | Demographics, stage (localised, regional, advanced) |

|                                        |                                                                                                                    |                                                                                                        |                                                                                                                 |                            |                         |                                                                                                                                                                                                                                                                                           |                            |
|----------------------------------------|--------------------------------------------------------------------------------------------------------------------|--------------------------------------------------------------------------------------------------------|-----------------------------------------------------------------------------------------------------------------|----------------------------|-------------------------|-------------------------------------------------------------------------------------------------------------------------------------------------------------------------------------------------------------------------------------------------------------------------------------------|----------------------------|
| <b>Nadpara 2016</b> (34)<br>USA        | Medicare beneficiaries aged >66 diagnosed with LC, care stratified as per clinical guidelines<br><br>n=1641        | Registry (West Virginia Cancer Registry-Medicare)<br><br>2003-2006                                     | CXR to first review; PC referral to first review; diagnosis to treatment; PC referral to treatment              | Survival                   | Timeliness deleterious  | Overall median survival no different in those receiving timely vs delayed care (299 vs 467 days, p=0.3), similar when stratified by stage and histology. However adjusted lung cancer mortality lower amongst patients receiving delayed care (HR 0.75, p<0.05), but full data not given. | Demographics               |
| <b>Napolitano 2020</b> (37)<br>USA     | Histologically confirmed NSCLC referred for surgery<br><br>n = 112                                                 | Single centre, observational cohort study<br><br>2013 – 2016                                           | Time from first detection on CT to surgical resection                                                           | Upstaging                  | Non-significant         | No significant difference between risk of upstaging in private vs Medicare insured (p=0.3), despite longer wait times for Medicare insured cohort                                                                                                                                         | Demographics               |
| <b>Navani 2015</b> (57)<br>UK          | All radiological stage I-IIIa lung cancers, randomised to EBUS vs usual care for first diagnostic test<br><br>n=96 | Multicentre RCT<br><br>2008 - 2011                                                                     | First review to treatment decision                                                                              | Survival                   | Timeliness advantageous | EBUS group experienced shorter time to treatment plan and improved median survival                                                                                                                                                                                                        | Stage (localised), surgery |
| <b>Radzikowska 2012</b> (44)<br>Poland | Histologically confirmed NSCLC, any treatment modality<br><br>n=6384                                               | Registry (Register of the National Tuberculosis and Lung Diseases Research Institute)<br><br>1995-1998 | PC referral to first review; first review to first procedure; first review to diagnosis; diagnosis to treatment | OS                         | Timeliness deleterious  | Secondary care delays <52 days associated with worse overall survival (HR 1.18, p=0.001)                                                                                                                                                                                                  | Clinical factors           |
| <b>Redaniel 2015</b> (42)<br>UK        | All lung cancer diagnoses, defined by presence or absence of NICE 'alert' symptoms<br><br>n=5737*                  | Registry (Clinical Practice Research Datalink; Merged Cancer Registry; HES; ONS)<br><br>1998-2009      | PC presentation to diagnosis                                                                                    | Survival                   | Mixed                   | Worse survival with intervals from first presentation to diagnosis of <1 month versus >6 months for patients without 'alert' symptoms, but no significant association in patients where 'alert' symptoms were present                                                                     | Clinical factors           |
| <b>Robinson 2015</b> (61)<br>Canada    | All biopsy confirmed stage 3 NSCLC<br><br>n=237                                                                    | Single centre, observational cohort study<br><br>2008 - 2012                                           | Abnormal CT to oncology consultation; respiratory consultation to oncology consultation                         | Change in treatment intent | Non-significant         | Patients who experienced weight loss or decline in performance status which resulted in a palliative approach to treatment did not have delayed care                                                                                                                                      | Stage (regional)           |



|                                      |                                                                                                             |                                                                                     |                                                                                                |                                  |                         |                                                                                                                                                                                                                              |                                                            |
|--------------------------------------|-------------------------------------------------------------------------------------------------------------|-------------------------------------------------------------------------------------|------------------------------------------------------------------------------------------------|----------------------------------|-------------------------|------------------------------------------------------------------------------------------------------------------------------------------------------------------------------------------------------------------------------|------------------------------------------------------------|
| <b>Samson 2015</b> (31)<br>USA       | All clinical stage 1 NSCLC undergoing surgery<br>n=27,022                                                   | Single centre, observational case:control study plus registry (NCDB)<br>1998 - 2010 | Diagnosis to treatment                                                                         | Pathological upstaging, survival | Timeliness advantageous | Delays of ≥8 weeks from diagnosis to surgery associated with higher risk of pathological upstaging and reduced median survival.                                                                                              | Stage (localised), surgery                                 |
| <b>Selva 2014</b> (63)<br>Spain      | All NSCLC diagnosed either via rapid access referral route or (retrospective) via standard pathway<br>n=362 | Single centre, 'quasi-interventional' case:control study<br>2005 - 2009             | First secondary care appt booked to first treatment<br><br>Diagnosis to treatment interval     | Upstaging                        | Non-significant         | Rapid access reduced time to treatment but did not achieve a stage shift.                                                                                                                                                    | Intervention                                               |
| <b>Shin 2013</b> (38)<br>South Korea | Histologically confirmed LC undergoing primary surgery<br>n=398                                             | Registry (Korean Central Cancer Registry)<br>2006 - 2011                            | Diagnosis to treatment                                                                         | OS                               | Non-significant         | No association between time to surgery (<1 to >12 weeks) and all-cause mortality                                                                                                                                             | Stage (localised), surgery                                 |
| <b>Tsai 2020</b> (53)<br>Taiwan      | Histologically confirmed NSCLC receiving active treatment<br>n=42,962                                       | Registry (Taiwan Cancer Registry Database)<br>2004 – 2010                           | Histological diagnosis to treatment                                                            | OS                               | Mixed                   | Delays ≥7 days associated with increased relative risk of death in stage 1 (HR 1.45-2.41) and stage II disease (HR 1.21 – 1.58), but only significant for delays of >60 days in stage III, and non-significant for stage IV. | Stage (localised, regional, advanced)                      |
| <b>Vinod 2017</b> (48)<br>Australia  | All NSCLC (any treatment)<br>n=1729                                                                         | Registry (South Western Sydney Local Health Central Cancer Registry)<br>2006 - 2012 | Diagnosis to treatment                                                                         | Survival                         | Mixed                   | In patients with stage 3-4 NSCLC only, or stage 1-2 referred for palliative care, there was a marginal trend towards better survival in those who waited longer for treatment (mortality HR 0.99, p<0.05)                    | Stage (localised, regional, advanced), surgery, palliative |
| <b>Wai 2012</b> (60)<br>Canada       | Unresectable stage 3 NSCLC<br>n=357                                                                         | Case:control (2:1 radical vs palliative treatment intent)<br>1990-2000              | First abnormal test to diagnosis; diagnosis to oncology referral; oncology review to treatment | Treatment intent                 | Non-significant         | No significant difference between time to oncologist assessment and treatment intent.                                                                                                                                        | Stage (regional)                                           |
| <b>Wang 2012</b> (49)<br>USA         | Inoperable stage 1-3 NSCLC with serial pre-treatment PET/CT scans<br>n=34                                   | Multi-centre observational cohort study<br>2003 - 2010                              | First CT/PET to first treatment                                                                | Upstaging, PFS, OS               | Timeliness advantageous | Inter-scan interval > 58 days associated with higher rates of progression (46.2% vs 4.8%, p=0.007).<br><br>Tumour growth rates and TTT were not associated with OS or PFS.                                                   | Stage (localised)                                          |

|                                         |                                                                                                |                                                          |                                                        |                     |                         |                                                                                                    |                            |
|-----------------------------------------|------------------------------------------------------------------------------------------------|----------------------------------------------------------|--------------------------------------------------------|---------------------|-------------------------|----------------------------------------------------------------------------------------------------|----------------------------|
| <b>Yang 2017</b> (58)<br>USA            | Stage 1A squamous cell carcinoma undergoing surgery<br>n=4984                                  | Registry (NCDB)<br>2006 - 2011                           | Diagnosis to treatment                                 | Survival            | Timeliness advantageous | Worse 5-year survival in those waiting >38 days from diagnosis to treatment                        | Stage (localised), surgery |
| <b>Yun 2012</b> (54)<br>South Korea     | All lung cancer patients undergoing curative surgery<br>n=9097*                                | Registry (Korean Central Cancer Registry)<br>2001 - 2005 | Diagnosis to treatment                                 | Survival            | Timeliness advantageous | Treatment delay >1 month associated with worse survival, particularly in low/medium volume centres | Stage (localised), surgery |
| <b>Živković 2014</b> (28)<br>Montenegro | All lung cancers diagnosed via single centre with >12 months follow up data available<br>n=151 | Single centre, observational cohort study<br>2009        | PC referral to first review; first review to diagnosis | Upstaging, survival | Non-significant         | No association between time from referral to treatment and disease stage or survival.              | Nil                        |

(\*) denotes total study sample size, where NSCLC forms an unspecified subgroup

CT = computed tomography; CWT: Cancer Waiting Times; EBUS = endobronchial ultrasound; HES = Hospital Episode Statistics; HR; hazard ratio; ISI = interscan interval; LC: lung cancer; MDT; multidisciplinary team; NCDB = National Cancer Database; NCRAS = National Cancer Registration and Analysis Service; NOS = not otherwise specified; NSCLC = non-small cell lung cancer; ONS = Office for National Statistics; OS = overall survival; PC = primary care; PET = positron emission tomography; PFS = progression free survival; RCT: randomised controlled trial; TTT: Time to treatment; UK: United Kingdom; US = United States of America

Figure 2: Reported median time intervals for included studies

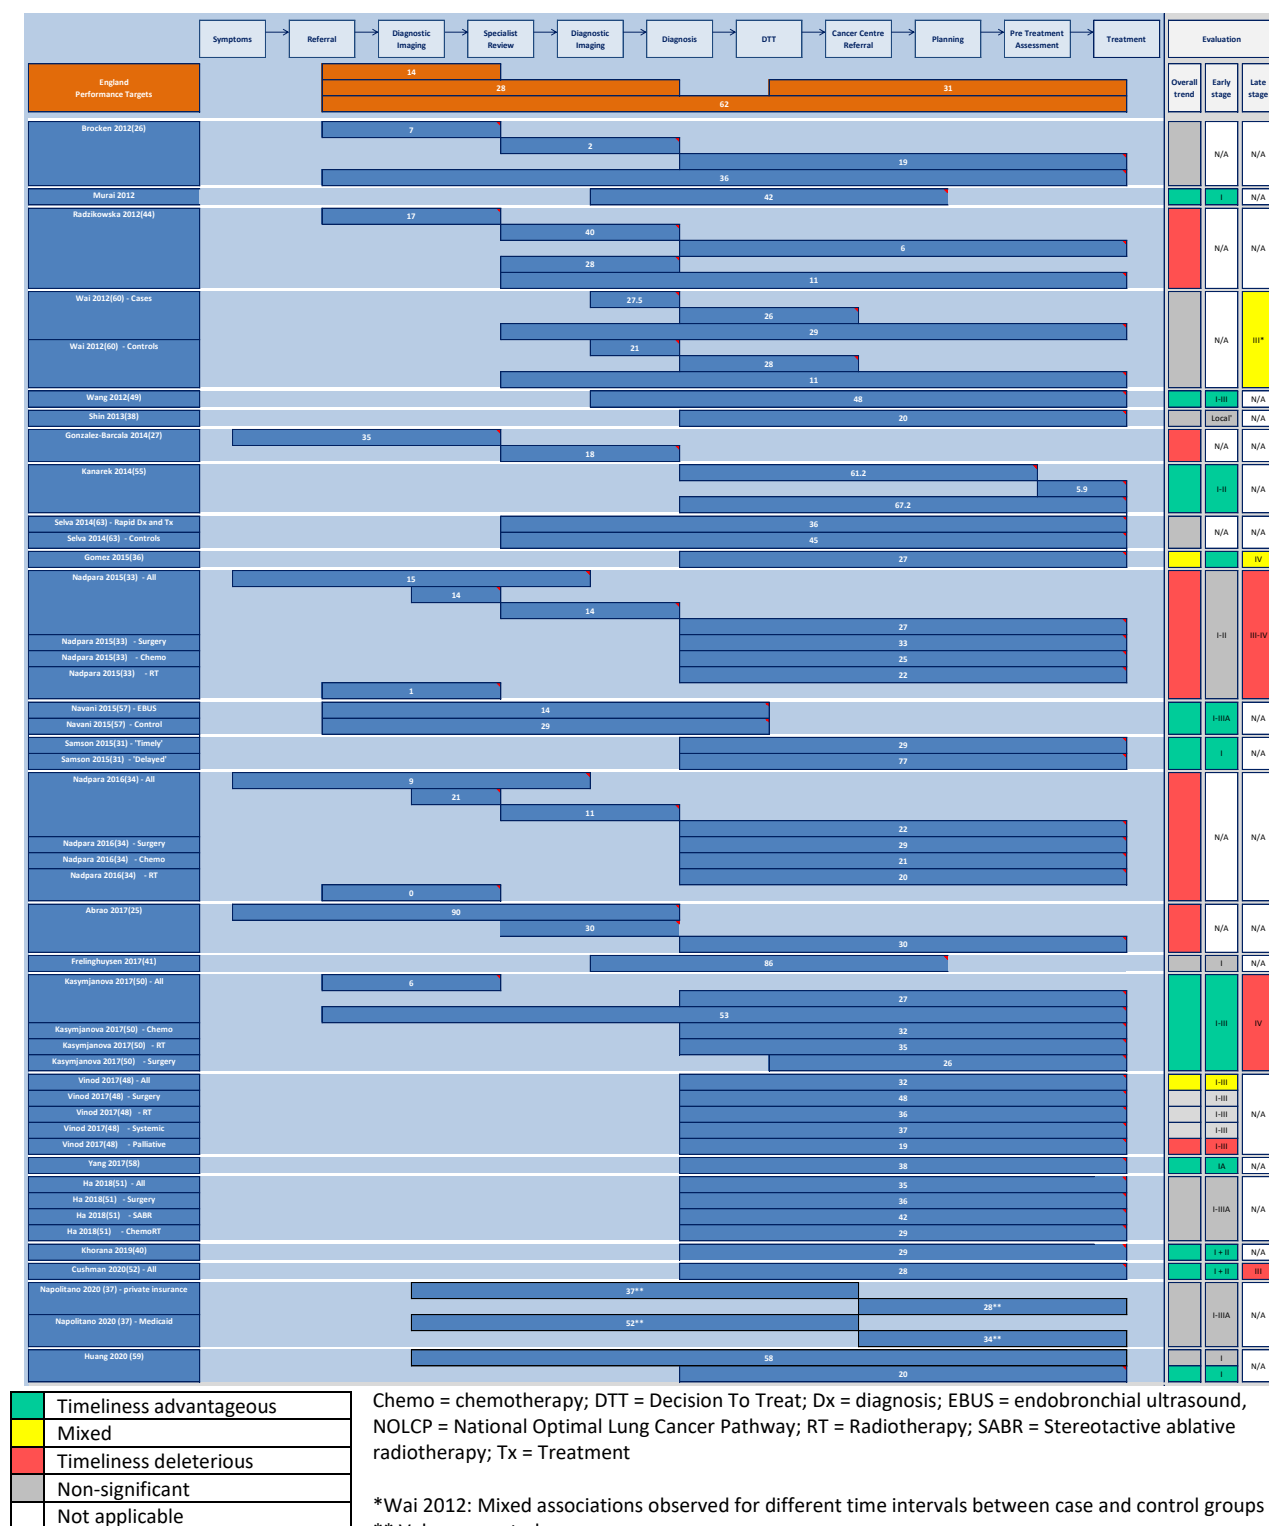

**Table 3a: Summary of evidence in early disease (excludes studies only reporting surgical data, see Table 3d)**

|                          | Study                  | Study design                         | Stage       | Treatment                             | n       | Time interval                     | Delay definition                        | Outcome measure                | Trend                   | Outcome                                                                              |
|--------------------------|------------------------|--------------------------------------|-------------|---------------------------------------|---------|-----------------------------------|-----------------------------------------|--------------------------------|-------------------------|--------------------------------------------------------------------------------------|
| ALL TREATMENT MODALITIES |                        |                                      |             |                                       |         |                                   |                                         |                                |                         |                                                                                      |
| STAGE I only             | Murai 2012(47)         | Observational cohort (multi-centre)  | I           | Referred for SABR                     | 201     | Diagnostic CT to SABR planning CT | Interscan interval >4 weeks             | Upstaging                      | Timeliness advantageous | Risk of upstaging 20.8% vs 0% (p=0.003) for delayed vs timely care.                  |
|                          | Nadpara 2015(33)       | Observational cohort (registry)      | I           | Surgery, radiotherapy or chemotherapy | 3,478   | Diagnosis to treatment            | >8 weeks from diagnosis to surgery      | Lung cancer specific mortality | Non-significant         | 3yr survival rate 0.62 (0.6 - 0.64) vs 0.58 (0.55 - 0.62) for timely vs delayed      |
|                          |                        |                                      |             |                                       |         |                                   | >7 weeks from diagnosis to chemotherapy |                                |                         |                                                                                      |
|                          |                        |                                      |             |                                       |         |                                   | >6 weeks from diagnosis to radiotherapy |                                |                         |                                                                                      |
|                          | Bullard 2017(39)       | Observational cohort (registry)      | 'Localised' | Surgery, chemotherapy or radiotherapy | 185     | Diagnosis to treatment            | >42 days                                | Median survival                | Non-significant         | HR for mortality 0.98 (p=0.94) for timely vs delayed                                 |
|                          | Frelinghuysen 2017(41) | Observational cohort                 | I           | Referred for SABR                     | 117     | Diagnostic CT to SABR planning CT | NA                                      | Upstaging, survival            | Non-significant         | Median ISI no different between stable T1, upstaged T1 and stable T2 lesions (p=0.4) |
|                          | Abrao 2018(46)         | Observational cohort (single centre) | I           | Any                                   | 30      | Diagnosis to treatment            | > 8 weeks                               | All-cause mortality            | Non-significant         | HR 1.24 (0.39-3.98, p=0.71) for delayed vs timely treatment                          |
|                          | Di Girolamo 2018(32)   | Observational cohort (registry)      | I           | Any                                   | 6,158   | GP referral to first review       | >14 days                                | 1 year net survival            | Non-significant         | 88.8% (CI 87.9-89.7) vs 84.8% (78.7 - 91.0)                                          |
|                          |                        |                                      |             |                                       | 15,363  | Diagnosis to treatment            | >31 days                                |                                | Timeliness deleterious  | 89.3% (88.7 - 89.9) vs 95.6% (94.0 - 97.3)                                           |
|                          |                        |                                      |             |                                       | 5,932   | GP referral to treatment          | >62 days                                |                                | Non-significant         | 91.2% (90.1-92.3) vs 93.4% (92.1-94.6)                                               |
|                          | Khorana 2019(40)       | Observational cohort (registry)      | I           | Any                                   | 280,175 | Diagnosis to treatment            | >6 weeks                                | Overall survival               | Timeliness advantageous | HR 1.032 (1.031-1.034, p<0.001) for each week delay                                  |

|               |                      |                                      |    |                                       |        |                                     |                                              |                                |                         |                                                                                  |
|---------------|----------------------|--------------------------------------|----|---------------------------------------|--------|-------------------------------------|----------------------------------------------|--------------------------------|-------------------------|----------------------------------------------------------------------------------|
|               | Cushman 2020(52)     | Observational cohort (registry)      | I  | Surgery, chemotherapy or radiotherapy | 95,378 | Histological diagnosis to treatment | >45 days                                     | Overall survival               | Timeliness advantageous | HR 1.15 (HR 1.12 – 1.17) for delayed vs timely                                   |
|               | Tsai 2020(53)        | Observational cohort (registry)      | I  | Surgery, chemotherapy or radiotherapy | 5,681  | Histological diagnosis to treatment | Categorical (≤7 days, 8-14, 15-60, ≥61 days) | Overall survival               | Timeliness advantageous | HR 1.45-2.41 for all intervals versus ≤7 days (p<0.001 for all)                  |
| STAGE II only | Nadpara 2015(33)     | Observational cohort (registry)      | II | Surgery, radiotherapy or chemotherapy | 766    | Diagnosis to treatment              | >8 weeks from diagnosis to surgery           | Lung cancer specific mortality | Non-significant         | 3yr survival rate 0.40 (0.36 - 0.45) vs 0.37 (0.30 - 0.44) for timely vs delayed |
|               |                      |                                      |    |                                       |        |                                     | >7 weeks from diagnosis to chemotherapy      |                                |                         |                                                                                  |
|               |                      |                                      |    |                                       |        |                                     | >6 weeks from diagnosis to radiotherapy      |                                |                         |                                                                                  |
|               | Abrao 2018(46)       | Observational cohort (single centre) | II | Any                                   | 26     | Diagnosis to treatment              | > 8 weeks                                    | All-cause mortality            | Timeliness advantageous | HR 3.08 (1.05 – 9.0, p=0.04) for delayed vs timely                               |
|               | Di Girolamo 2018(32) | Observational cohort (registry)      | II | Any                                   | 4,460  | GP referral to first review         | >14 days                                     | 1 year net survival            | Non-significant         | 73.5% (72.1-74.9) vs 76.4% (68.0-84.7) for timely vs delayed                     |
|               |                      |                                      |    |                                       | 8,614  | Diagnosis to treatment              | >31 days                                     |                                | Timeliness deleterious  | 74.4% (73.4-75.4) vs 86.1% (82.1-90.0) for timely vs delayed                     |
|               |                      |                                      |    |                                       | 4,200  | GP referral to treatment            | >62 days                                     |                                | Timeliness deleterious  | 76.4% (74.6-78.2) vs 81.0% (78.9-83.0) for timely vs delayed                     |
|               | Khorana 2019(40)     | Observational cohort (registry)      | II | Any                                   | 83,688 | Diagnosis to treatment              | >6 weeks                                     | Overall survival               | Timeliness advantageous | HR 1.016 (1.014 - 1.018, p<0.001) for each week delay for delayed vs timely      |
|               | Cushman 2020(52)     | Observational cohort (registry)      | II | Surgery, chemotherapy or radiotherapy | 22,072 | Histological diagnosis to treatment | >45 days                                     | Overall survival               | Timeliness advantageous | HR 1.05 (1.01 – 1.09) for delayed vs timely                                      |
|               | Tsai 2020(53)        | Observational cohort (registry)      | II | Surgery, chemotherapy or radiotherapy | 1,526  | Histological diagnosis to treatment | Categorical (≤7 days, 8-14, 15-60, ≥61 days) | Overall survival               | Timeliness advantageous | HR 1.21-1.58 for all groups versus ≤7 days (p<0.05 for all)                      |

|                  |                      |                                                               |             |                                                          |       |                                                   |                                                           |                                   |                         |                                                                           |
|------------------|----------------------|---------------------------------------------------------------|-------------|----------------------------------------------------------|-------|---------------------------------------------------|-----------------------------------------------------------|-----------------------------------|-------------------------|---------------------------------------------------------------------------|
| STAGE I-IIIA NOS | Wang 2012(49)        | Observational cohort (multi-centre)                           | I-III       | Radiotherapy +/- concurrent chemotherapy                 | 34    | Diagnostic PET to treatment planning PET          | ISI >58 days                                              | Disease progression and upstaging | Timeliness advantageous | OR for disease progression 1.027 (p = 0.02) in delayed vs timely.         |
|                  | Gomez 2015(36)       | Observational cohort (registry)                               | 'Localised' | Any surgery, radio- or chemotherapy, or combination      | 7,960 | Diagnosis to treatment                            | > 35 days                                                 | All-cause mortality               | Timeliness advantageous | HR 0.86 (0.8-0.91, p < 0.01) for timely vs delayed                        |
|                  | Navani 2015(57)      | Multi-centre RCT: EBUS vs usual care as first diagnostic test | I-IIIA      | All                                                      | 96    | First secondary care review to treatment decision | Intervention (median 15 days) vs control (median 30 days) | Survival                          | Timeliness advantageous | Median survival 503 days vs 312 days (p=0.038) in intervention vs control |
|                  | Kasymjanova 2017(50) | Observational cohort (single centre)                          | I-IIB       | Any active treatment                                     | 177   | Diagnosis to treatment                            | >30 days                                                  | Survival                          | Timeliness advantageous | HR for survival 2.07 (1.45-2.97, p<0.001) for timely vs delayed           |
|                  | Vinod 2017(48)       | Observational cohort (registry)                               | I-II        | Any                                                      | 375   | Diagnosis to treatment                            | NS                                                        | Survival                          | Non-significant         | All: HR 1 (1 - 1.01, p=0.25)                                              |
|                  |                      |                                                               | I-III       | Radiotherapy                                             | 288   |                                                   |                                                           |                                   | Non-significant         | Radiotherapy: HR 0.99 (p=0.11)                                            |
|                  |                      |                                                               |             | Palliation                                               | 148   |                                                   |                                                           |                                   | Timeliness deleterious  | Palliative: HR 0.99 (0.98-0.99, p=0.02) for timely vs delayed             |
|                  | Ha 2018(51)          | Observational cohort (single centre)                          | I-IIIA      | Surgery, radiotherapy, chemotherapy, combination or none | 177   | Tumour board meeting to treatment initiation      | Guideline concordance                                     | Overall survival                  | Non-significant         | HR 1.0 (p=0.56) for survival                                              |
|                  |                      |                                                               | I           |                                                          | 122   |                                                   |                                                           | Disease-free survival             |                         | Disease free survival in stage 1 subgroup (HR 1.0, p=0.74)                |

CT = computed tomography; GP = general practitioner (primary care); HR = hazard ratio; ISI = interscan interval; PET = positron emission tomography; SABR = stereotactic ablative radiotherapy

**Table 3b: Summary of evidence in regional disease**

| Study                | Study design                         | Stage      | Treatment                                           | n     | Time interval                           | Delay definition                        | Outcome measure                | Trend                   | Outcome                                                                                                                                                              |
|----------------------|--------------------------------------|------------|-----------------------------------------------------|-------|-----------------------------------------|-----------------------------------------|--------------------------------|-------------------------|----------------------------------------------------------------------------------------------------------------------------------------------------------------------|
| Wai 2012(60)         | Case control (registry)              | III        | Chemoradiotherapy                                   | 119   | Diagnosis to cancer centre referral     | NA                                      | Treatment intent               | Timeliness advantageous | Median duration 26 days vs 28 days for radical CRT recipients vs palliative Tx, p=0.035                                                                              |
|                      |                                      |            |                                                     |       | Diagnosis to oncology consult           |                                         |                                | Non-significant         | Median duration 31 days vs 31.5 days for radical CRT recipients vs palliative Tx, p=0.264                                                                            |
|                      |                                      |            | Palliative                                          | 238   | Oncologist review to start of treatment |                                         |                                | Timeliness deleterious  | Median duration 29 days vs 11 days for radical CRT recipients vs palliative, p <0.0001                                                                               |
| Gomez 2015(36)       | Observational cohort (registry)      | 'Regional' | Any surgery, radio- or chemotherapy, or combination | 8,962 | Diagnosis to treatment                  | > 35 days                               | All-cause mortality            | Non-significant         | HR 1.05 (0.8 - 0.91, p=0.054) for timely vs delayed treatment                                                                                                        |
| Robinson 2015(61)    | Observational cohort (single centre) | III        | Radical vs palliative (any)                         | 237   | CT imaging to oncology consultation     | NA                                      | Treatment intent               | Non-significant         | No association between median time intervals and clinical deterioration impacting treatment intent                                                                   |
|                      |                                      |            |                                                     |       | Respiratory review to oncology review   |                                         |                                |                         |                                                                                                                                                                      |
| Nadpara 2015(33)     | Observational cohort (registry)      | III        | Surgery, radiotherapy or chemotherapy               | 5,291 | Diagnosis to treatment                  | >8 weeks from diagnosis to surgery      | Lung cancer specific mortality | Timeliness deleterious  | Median survival 305 days (*291 - 317) vs 472 days (443 - 498) for timely vs delayed treatment = * = 95% CI                                                           |
|                      |                                      |            |                                                     |       |                                         | >7 weeks from diagnosis to chemotherapy |                                |                         |                                                                                                                                                                      |
|                      |                                      |            |                                                     |       |                                         | >6 weeks from diagnosis to radiotherapy |                                |                         |                                                                                                                                                                      |
| Friedman 2016(62)    | Observational cohort (single centre) | III        | Any                                                 | 109   | First clinical review to treatment      | NA                                      | Overall survival               | Non-significant         | Patients seen by cancer board versus single clinician experienced faster treatment with borderline significant improved median survival (14 vs 17 months, p = 0.054) |
| Kasymjanova 2017(50) | Observational cohort (single centre) | III        | Any active treatment                                | 111   | Diagnosis to treatment                  | >30 days                                | Overall survival               | Timeliness advantageous | Median survival 17.2 vs 32.7 months for delayed vs timely treatment (p=0.04)                                                                                         |

|                      |                                      |                   |                                       |        |                                     |                                                           |                     |                         |                                                                          |
|----------------------|--------------------------------------|-------------------|---------------------------------------|--------|-------------------------------------|-----------------------------------------------------------|---------------------|-------------------------|--------------------------------------------------------------------------|
| Bullard 2017(39)     | Observational cohort (registry)      | 'Regional' II-III | Surgery, chemotherapy or radiotherapy | 232    | Diagnosis to treatment              | >42 days                                                  | Survival            | Non-significant         | HR for mortality 1.18 (p=0.41) for timely vs delayed                     |
| Vinod 2017(48)       | Observational cohort (registry)      | III               | Any                                   | 422    | Diagnosis to treatment              | NA                                                        | Survival            | Timeliness deleterious  | HR for mortality 0.99 (95% CI 0.99 – 0.99, p=0.03) for delayed vs timely |
| Abrao 2018(46)       | Observational cohort (single centre) | III               | Any                                   | 73     | Diagnosis to treatment              | > 8 weeks                                                 | All-cause mortality | Non-significant         | HR 0.65 (0.38 - 1.1, p=0.11) for delayed vs timely treatment             |
| Di Girolamo 2018(32) | Observational cohort (registry)      | III               | Any                                   | 14,453 | GP referral to first review         | >14 days                                                  | 1 year net survival | Non-significant         | 48.1% (47.3-49.0) vs 46.2% (41.2-51.3)                                   |
|                      |                                      |                   |                                       | 23,667 | Diagnosis to treatment              | >31 days                                                  |                     | Timeliness deleterious  | 53.9% (53.3-54.6) vs 74.5% (69.7-79.2)                                   |
|                      |                                      |                   |                                       | 12,495 | GP referral to treatment            | >62 days                                                  |                     | Non-significant         | 52.4% (51.3-53.4) vs 65.2% (63.5-67.0)                                   |
| Cushman 2020(52)     | Observational cohort (registry)      | III               | Surgery, chemotherapy or radiotherapy | 23,005 | Histological diagnosis to treatment | >45 days                                                  | Overall survival    | Timeliness deleterious  | HR 0.93 (0.89-0.96) for delayed vs timely                                |
| Tsai 2020(53)        | Observational cohort (registry)      | III               | Surgery, chemotherapy or radiotherapy | 11,696 | Histological diagnosis to treatment | Categorical ( $\leq 7$ days, 8-14, 15-60, $\geq 61$ days) | Overall survival    | Timeliness advantageous | HR 1.13 for delays $\geq 61$ days versus $\leq 7$ days (p = 0.001)       |

CI = confidence interval; CRT = chemoradiotherapy; HR = hazard ratio; Tx = treatment



**Table 3c: Summary of evidence in advanced disease**

| Study                | Study design                         | Stage     | Treatment                             | n      | Time interval                       | Delay definition                        | Outcome measure                                                  | Trend                   | Outcome (timely vs delayed)                                                                   |
|----------------------|--------------------------------------|-----------|---------------------------------------|--------|-------------------------------------|-----------------------------------------|------------------------------------------------------------------|-------------------------|-----------------------------------------------------------------------------------------------|
| Nadpara 2015(33)     | Observational cohort (registry)      | IV        | Surgery, radiotherapy or chemotherapy | 7,212  | Diagnosis to treatment              | >8 weeks from diagnosis to surgery      | Lung cancer specific mortality                                   | Timeliness deleterious  | Median survival 146 days (CI 140 - 152) vs 290 days (270-308) for timely vs delayed treatment |
|                      |                                      |           |                                       |        |                                     | >7 weeks from diagnosis to chemotherapy |                                                                  |                         |                                                                                               |
|                      |                                      |           |                                       |        |                                     | >6 weeks from diagnosis to radiotherapy |                                                                  |                         |                                                                                               |
| Gomez 2015(36)       | Observational cohort (registry)      | 'Distant' | Surgery, radiotherapy or chemotherapy | 11,810 | Diagnosis to treatment              | > 35 days                               | All-cause mortality (for those with survival <1 year vs >1 year) | Timeliness deleterious  | HR 1.35 (1.28 - 1.42, p<0.001) for timely vs delayed treatment in patients surviving <1 year  |
|                      |                                      |           |                                       |        |                                     |                                         |                                                                  | Timeliness advantageous | HR 0.86 (0.74-0.99, p=0.042) for timely vs delayed treatment in patients surviving ≥1 year    |
| Kasymjanova 2017(50) | Observational cohort (single centre) | IV        | Any active treatment                  | 390    | Diagnosis to treatment              | >30 days                                | All-cause mortality                                              | Timeliness deleterious  | HR 0.72 (0.58-0.92, p = 0.008) for delayed vs timely treatment                                |
| Vinod 2017(48)       | Observational cohort (registry)      | IV        | Any                                   | 878    | Diagnosis to treatment              | NS                                      | Survival                                                         | Timeliness deleterious  | HR for mortality 0.99 (95% CI 0.99 – 0.99, p=0.0008) for delayed vs timely                    |
| Bullard 2017(39)     | Observational cohort (registry)      | 'Distant' | Surgery, radiotherapy or chemotherapy | 329    | Diagnosis to treatment              | >6 weeks                                | Survival                                                         | Timeliness deleterious  | HR for mortality 2.2 (p<0.001) for timely vs delayed                                          |
| Abrao 2018(46)       | Observational cohort (single centre) | IV        | Any                                   | 230    | Diagnosis to treatment              | >8 weeks                                | All-cause mortality                                              | Timeliness deleterious  | HR for mortality 0.48 (0.35-0.66, p<0.001) for delayed vs timely                              |
| Di Girolamo 2018(32) | Observational cohort (registry)      | IV        | Any                                   | 22,460 | GP referral to first review         | >14 days                                | 1 year net survival                                              | Non-significant         | 23.3% (22.8 - 23.9) vs 19.5% (16.1-22.9)                                                      |
|                      |                                      |           |                                       | 31,442 | Diagnosis to treatment              | >31 days                                |                                                                  | Timeliness deleterious  | 33.8% (33.2-34.3) vs 52.6% (45.0-60.2)                                                        |
|                      |                                      |           |                                       | 14,665 | GP referral to treatment            | >62 days                                |                                                                  | Timeliness deleterious  | 33.8% (33.0-34.7) vs 44.6% (42.6-46.7)                                                        |
| Tsai 2020(53)        | Observational cohort (registry)      | IV        | Surgery, chemotherapy or radiotherapy | 24,059 | Histological diagnosis to treatment | Categorical (≤7, 8-14, 15-60, ≥61 days) | Overall survival                                                 | Non-significant         | No significant association between any delay and survival                                     |

GP = general practitioner; HR = hazard ratio

Table 3d: Summary of evidence in surgical cohorts

|               | Study             | Study design                         | Stage | n                | Time interval                           | Delay definition     | Outcome measure        | Trend                   | Outcome                                                                                                       |
|---------------|-------------------|--------------------------------------|-------|------------------|-----------------------------------------|----------------------|------------------------|-------------------------|---------------------------------------------------------------------------------------------------------------|
| SURGERY ONLY  |                   |                                      |       |                  |                                         |                      |                        |                         |                                                                                                               |
| STAGE I only  | Bott 2015(56)     | Observational cohort (registry)      | I     | 55,653           | Diagnosis to treatment                  | >8 weeks             | Pathological upstaging | Timeliness advantageous | HR 1.1 for upstaging (p=0.002) for delayed vs timely treatment                                                |
|               | Coughlin 2015(45) | Observational cohort (single centre) | I     | 180              | Treatment decision to surgery           | Categorical (months) | Upstaging              | Non-significant         | OR 0.216 (p=0.07) for delays of ≥3 months vs <1 month                                                         |
|               |                   |                                      |       |                  |                                         |                      | Survival               |                         | HR 1.064 (p=0.92) for delays of ≥3 months vs <1 month                                                         |
|               | Samson 2015(31)   | Case:control (registry)              | I     | 13,511 'delayed' | Diagnosis to treatment                  | > 8 weeks            | Survival, upstaging    | Timeliness advantageous | Upstaging from clinical T1 significantly more likely in delayed vs timely (p=0.002)                           |
|               |                   |                                      |       | 13,511 'timely'  |                                         |                      |                        |                         | Median survival 69.9 (+/- 1.3) months vs 57.7 (+/- 1.0) months for timely vs delayed, HR 1.004 per week delay |
|               | Samson 2015(31)   | Case:control (single centre)         | I     | 449 'delayed'    | Diagnosis to treatment                  | > 8 weeks            | Upstaging              | Timeliness deleterious  | 25% vs 16% for timely vs delayed (p=0.001)                                                                    |
|               |                   |                                      |       | 522 'timely'     |                                         |                      | Survival               | Non-significant         | Median survival 97.5 months (0.2-168.6) vs 90.5 (0-172.8)                                                     |
|               | Yang 2017(58)     | Observational cohort (registry)      | IA    | 4,984            | Diagnosis to treatment                  | >38 days             | 5 year survival        | Timeliness advantageous | HR for death at 5 years 1.13 (1.02 – 1.25) in delayed vs timely care                                          |
|               | Khorana 2019(40)  | Observational cohort (registry)      | I     | 193,058          | Diagnosis to treatment                  | >6 weeks             | OS                     | Timeliness advantageous | HR 1.024 (1.022-1.026, p<0.001) for each week delay                                                           |
|               | Huang 2020(59)    | Observational cohort (single centre) | I     | 561              | Radiological diagnosis to surgery (RDS) | >60 days             | OS                     | Non-significant         | 5 year survival 83.3% vs 83.7% for timely vs delayed RDS (p = 0.57)                                           |
|               |                   |                                      |       |                  | Histological diagnosis to surgery (HDS) | >21 days             |                        | Timeliness advantageous | 5 year survival 85.5% vs 75.9% for timely vs delayed HDS (p = 0.003). HR 2.031 in multivariate analysis.      |
| STAGE II only | Coughlin 2015(45) | Observational cohort (single centre) | II    | 42               | Treatment decision to surgery           | Categorical (months) | Upstaging              | Timeliness advantageous | OR 2.0 (p=0.02) for delays of ≥2 months vs <1 month                                                           |
|               |                   |                                      |       |                  |                                         |                      | Survival               |                         | HR 3.6 (p=0.036) for delays of ≥2 months vs <1 month                                                          |

|                  |                  |                                      |         |        |                                                   |                                                           |                     |                         |                                                                                  |
|------------------|------------------|--------------------------------------|---------|--------|---------------------------------------------------|-----------------------------------------------------------|---------------------|-------------------------|----------------------------------------------------------------------------------|
|                  | Khorana 2019(40) | Observational cohort (registry)      | II      | 49,386 | Diagnosis to treatment                            | >6 weeks                                                  | OS                  | Timeliness advantageous | HR 1.017 (1.014-1.021) for each week delay                                       |
| STAGE I-IIIA/NOS | Yun 2012(54)     | Observational cohort (registry)      | NS      | 9,094  | Diagnosis to treatment                            | >31 days                                                  | 5-year survival     | Timeliness advantageous | HR 1.16 (1.06 - 1.27) for survival in timely vs delayed                          |
|                  | Shin 2013(38)    | Observational cohort (registry)      | 'Local' | 191    | Diagnosis to treatment                            | >12 weeks                                                 | All-cause mortality | Non-significant         | HR 0.79 (CI 0.42 – 1.48) for delays up to 12 weeks vs any shorter interval.      |
|                  | Kanarek 2014(55) | Observational cohort (single centre) | I-IIA   | 174    | Diagnosis to treatment                            | >42 days                                                  | Survival            | Timeliness advantageous | HR 1.04 (CI 1.00 – 1.09) for each week's delay in surgery for stage I-II disease |
|                  | Navani 2015(57)  | Multi-centre RCT                     | I-IIIA  | 29     | First secondary care review to treatment decision | Intervention (median 15 days) vs control (median 30 days) | Survival            | Non-significant         | HR 0.37 (p=0.125) for survival in intervention vs control                        |
|                  | Vinod 2017(48)   | Observational cohort (registry)      | I-III   | 246    | Diagnosis to treatment                            | NS                                                        | Survival            | Non-significant         | HR 1.01 (p=0.48) for timely vs delayed                                           |
|                  | Cushman 2020(52) | Observational cohort (registry)      | I-III   | 85,267 | Histological diagnosis to treatment               | >45 days                                                  | Overall survival    | Timeliness advantageous | HR 1.14 (1.11 – 1.16) for delayed vs timely                                      |

HR = hazard ratio, NS = non-significant; OS = overall survival; RCT = randomised controlled trial

**Table 4: Comparison of studies utilising National Cancer Database (NCDB)**

| Study            | Years       | Inclusion criteria                                                        | Exclusion criteria                                                                                                                                                                            | Primary outcome measure |
|------------------|-------------|---------------------------------------------------------------------------|-----------------------------------------------------------------------------------------------------------------------------------------------------------------------------------------------|-------------------------|
| Bott 2015(56)    | 1998 – 2010 | Clinical stage I NSCLC undergoing resection                               | Patients with T2b disease                                                                                                                                                                     | Pathological upstaging  |
| Samson 2015(31)  | 1998 – 2010 | Clinical stage I NSCLC matched case:control for delayed vs timely surgery | Nil specified                                                                                                                                                                                 | Overall survival        |
| Khorana 2019(40) | 2004 – 2013 | Stage I-II NSCLC (alongside other cancers)                                | No treatment received; first treatment >180 days from diagnosis; unable to establish treatment intervals; uncommon histology                                                                  | Overall survival        |
| Cushman 2020(52) | 2004 – 2015 | Non-metastatic NSCLC, treated with curative intent                        | Metastatic or unidentified stage' palliative treatment only; chemotherapy or immunotherapy alone; no treatment received; unknown treatment interval; first treatment >365 days from diagnosis | Overall survival        |
| Yang 2020(58)    | 2006 - 2011 | Clinical stage IA squamous cell carcinoma, undergoing lobectomy           | Adjuvant chemo/radiotherapy; patients having surgery the same day as diagnosis (latterly included in sensitivity analysis)                                                                    | Overall survival        |

**Table E8a: Assessment of bias (observational studies)**

**1a.** Are eligibility criteria, sources and methods of participant selection and follow-up clearly described? **1b.** Is the study population likely to be representative of the target population?

**2a.** Are demographic and characteristic data provided and complete? **2b.** Are reasons for non-participation included?

**3a.** Are missing data measured and accounted for?

**4a.** Are definitions for both time-intervals and outcome measures defined *a priori*? **4b.** Are the definitions appropriately measurable?

**5a.** Are statistical methods described? **5b.** Are confounding factors controlled for? **5c.** Is there consideration of potential waiting-time paradox?

| Reference                  | 1a. | 1b.                                                | 2a.        | 2b. | 3a.     | 4a. | 4b.                | 5a. | 5b.               | 5c.           |
|----------------------------|-----|----------------------------------------------------|------------|-----|---------|-----|--------------------|-----|-------------------|---------------|
| Abrao 2017 (25)            | Yes | Yes                                                | Yes        | Yes | Yes     | Yes | Some symptom based | Yes | Unclear which     | In discussion |
| Abrao 2018 (46)            | Yes | Excluded unresectable disease diagnosed at surgery | Yes        | Yes | NA      | Yes | Yes                | Yes | Yes               | In discussion |
| Bott 2015 (56)             | Yes | Yes                                                | Yes        | Yes | Yes     | Yes | Yes                | Yes | Yes               | NA            |
| Brocken 2012 (26)          | Yes | Excluded stage IV                                  | Yes        | Yes | Yes     | Yes | Yes                | Yes | Yes               | Yes           |
| Bullard 2017 (39)          | Yes | Yes                                                | Yes        | Yes | Yes     | Yes | Yes                | Yes | Yes               | In discussion |
| Coughlin 2015 (45)         | Yes | Yes                                                | Yes        | NA  | Some    | Yes | Yes                | Yes | Yes               | NA            |
| Cushman 2020 (52)          | Yes | Yes                                                | Yes        | Yes | Yes     | Yes | Yes                | Yes | Yes               | Yes           |
| Di Girolamo 2018 (32)      | Yes | Yes                                                | Yes        | Yes | Yes     | Yes | Yes                | Yes | Some              | Yes           |
| Forrest 2015 (35)          | Yes | Yes                                                | Yes        | NA  | Yes     | Yes | Yes                | Yes | Yes               | Yes           |
| Frelinghuysen 2017 (41)    | Yes | Excludes treatment within 25 days                  | Yes        | Yes | Yes     | Yes | Yes                | Yes | No                | Yes           |
| Friedman 2016 (62)         | Yes | Yes                                                | Yes        | Yes | NA      | Yes | Yes                | Yes | No                | No            |
| Geiger 2014 (29)           | Yes | Yes                                                | Yes        | Yes | NA      | Yes | Yes                | Yes | Yes               | No            |
| Gomez 2015 (36)            | Yes | Excludes palliative care                           | Yes        | Yes | Yes     | Yes | Yes                | Yes | Yes               | Yes           |
| Gonzalez-Barcala 2014 (27) | Yes | Yes                                                | Yes        | Yes | Yes     | Yes | Some symptom based | Yes | Yes               | In discussion |
| Ha 2018 (51)               | Yes | Veterans                                           | Yes        | Yes | Yes     | Yes | Yes                | Yes | Yes               | In discussion |
| Huang 2020 (59)            | Yes | Yes                                                | Yes        | Yes | Yes     | Yes | Yes                | Yes | Yes               | NA            |
| Kanarek 2014 (55)          | Yes | Yes                                                | Yes        | Yes | Yes     | Yes | Yes                | Yes | Yes               | In discussion |
| Kasymjanova 2017 (50)      | Yes | Yes                                                | Yes        | Yes | Yes     | Yes | Yes                | Yes | Yes               | Yes           |
| Khorana 2019 (40)          | Yes | Some exclusions                                    | Yes        | Yes | Unclear | Yes | Yes                | Yes | Yes               | NA            |
| Murai 2012 (47)            | Yes | Yes                                                | Yes        | Yes | NA      | Yes | Yes                | Yes | Yes               | No            |
| Nadpara 2015 (33)          | Yes | Unclear                                            | Yes        | Yes | Yes     | Yes | Some symptom based | Yes | Yes               | Yes           |
| Nadpara 2016 (34)          | Yes | Yes                                                | Yes        | Yes | NA      | Yes | Some symptom based | Yes | Yes but not shown | In discussion |
| Napolitano 2020 (37)       | Yes | Single surgeon only                                | Yes        | No  | No      | Yes | Yes                | Yes | Some              | No            |
| Radzikowska 2012 (44)      | Yes | Yes                                                | Yes        | NA  | NA      | Yes | Yes                | Yes | Yes               | Yes           |
| Redaniel 2015 (42)         | Yes | Yes                                                | Yes        | Yes | Yes     | Yes | Some symptom based | Yes | Yes               | Yes           |
| Robinson 2015 (61)         | Yes | Yes                                                | Yes        | Yes | Yes     | Yes | Yes                | Yes | No                | No            |
| Samson 2015 (31)           | Yes | Yes                                                | Yes        | No  | No      | No  | Yes                | Yes | Yes               | NA            |
| Selva 2014 (63)            | Yes | Yes                                                | Yes        | Yes | NA      | Yes | Yes                | Yes | Yes               | In discussion |
| Shin 2013 (38)             | Yes | Yes                                                | Yes        | Yes | Yes     | Yes | Yes                | Yes | Yes               | In discussion |
| Tsai 2020 (53)             | Yes | Yes                                                | Yes        | Yes | Yes     | Yes | Yes                | Yes | Yes               | Yes           |
| Vinod 2017 (48)            | Yes | Yes                                                | Yes        | Yes | Yes     | Yes | Yes                | Yes | Yes               | In discussion |
| Wai 2012 (60)              | Yes | Yes                                                | Incomplete | Yes | Yes     | Yes | Yes                | Yes | Yes               | No            |

|                    |     |      |      |     |     |     |                    |      |           |               |
|--------------------|-----|------|------|-----|-----|-----|--------------------|------|-----------|---------------|
| Wang 2012 (49)     | Yes | Some | Yes  | Yes | NA  | Yes | Yes                | Yes  | No        | No            |
| Yang 2017 (58)     | Yes | Yes  | Yes  | Yes | Yes | Yes | Yes                | Yes  | Yes       | NA            |
| Yun 2012 (54)      | Yes | Yes  | Yes  | Yes | Yes | Yes | Yes                | Yes  | Yes       | NA            |
| Živković 2014 (28) | Yes | Yes  | Some | NA  | NA  | Yes | Some symptom based | Some | Histology | In discussion |

Table E8b: Assessment of bias (randomised controlled trials)

|                  | Selection bias             |                        | Performance bias         |                       | Detection bias                 | Attrition bias          | Reporting bias      | Other                |
|------------------|----------------------------|------------------------|--------------------------|-----------------------|--------------------------------|-------------------------|---------------------|----------------------|
|                  | Random sequence generation | Allocation concealment | Blinding of participants | Blinding of personnel | Blinding of outcome assessment | Incomplete outcome data | Selective reporting | Other source of bias |
| Navani 2015 (57) | Yes                        | Yes                    | Not possible             | Not possible          | Yes                            | No                      | No                  | No                   |
